# Supplementary material
Source: PubMed Central journal article supplement (PMC3020244)
Supplement: NIHMS233027-supplement-02.pdf [file NIHMS233027-supplement-02.pdf]

**Table 5. Glaucoma Medications at Baseline in the Ahmed Baerveldt Comparison study**

|                                                                | Overall Group<br>(n =276 ) | AGV Group<br>(n =143 ) | BGI Group<br>(n =133 ) | P-value <sup>a</sup> |
|----------------------------------------------------------------|----------------------------|------------------------|------------------------|----------------------|
| Prostaglandin analogue<br>n (%)                                | 224 (81%)                  | 118 (83%)              | 106 (80%)              | 0.64                 |
| Beta blocker<br>n (%)                                          | 231 (84%)                  | 116(81%)               | 115 (87%)              | 0.26                 |
| Topical carbonic anhydrase<br>Inhibitor, n (%)                 | 198 (72%)                  | 102 (71%)              | 96 (73%)               | 0.89                 |
| Alpha <sub>2</sub> agonist, n (%)                              | 195 (71%)                  | 103 (72%)              | 92 (69%)               | 0.79                 |
| Oral carbonic anhydrase<br>inhibitor, n (%)                    | 80 (29%)                   | 35 (25%)               | 45 (34%)               | 0.11                 |
| Miotic, n (%)                                                  | 15 (5%)                    | 7 (5%)                 | 8 (6%)                 | 0.79                 |
| Non-selective adrenergic<br>agonist (eg. epinephrine)<br>n (%) | 2 (1%)                     | 0 (0%)                 | 2 (2%)                 | 0.23                 |
| None, n (%)                                                    | 4 (1%)                     | 4 (3%)                 | 0 (0%)                 | 0.12                 |

<sup>a</sup>Fisher Exact test

AGV = Ahmed Glaucoma Valve; BGI = Baerveldt Glaucoma Implant
