# Supplementary material
Source: PubMed Central journal article supplement (PMC3020244)
Supplement: NIHMS233027-supplement-03.pdf [file NIHMS233027-supplement-03.pdf]

**Table 8: Operative Technique (Ahmed Glaucoma Valve versus Baerveldt Glaucoma Implant)**

|                                                                | AGV N=146 <sup>a</sup> | BGI N=130 <sup>a</sup> |
|----------------------------------------------------------------|------------------------|------------------------|
| Visco-elastic left in AC                                       | 82 (56%)               | 17 (13%)               |
| Patch graft:                                                   |                        |                        |
| None                                                           | 60 (41%)               | 51 (39%)               |
| Cornea                                                         | 54 (37%)               | 51 (39%)               |
| Pericardium                                                    | 31 (21%)               | 27 (21%)               |
| Donor sclera                                                   | 1 (1%)                 | 1 (1%)                 |
| Intraocular injection during or within 24 hours before surgery |                        |                        |
| Triamcinolone                                                  | 0                      | 0                      |
| Anti-angiogenic                                                | 3 (2%)                 | 0                      |
| Intraoperative medications                                     |                        |                        |
| Subconjunctival antibiotic                                     | 107 (73%)              | 98 (75%)               |
| Subconjunctival steroid                                        | 107 (73%)              | 98 (75%)               |
| Cycloplegic                                                    | 44 (30%)               | 37 (27%)               |
| Antibiotic-steroid Ointment                                    | 79 (54%)               | 67 (52%)               |
| Antibiotic-steroid drop                                        | 12 (8%)                | 13 (10%)               |
| Other                                                          | 10 (7%) <sup>b</sup>   | 7 (5%) <sup>c</sup>    |

<sup>a</sup>Three patients randomized to Baerveldt received Ahmed implants (protocol violations);; <sup>b</sup>2 intercameral steroid injection, 1 miotic drop, 4 steroid drop, 2 subconjunctival anesthetic, 1 topical antibiotic, <sup>c</sup>2 antibiotic drop, 3 intercameral steroid injection, 1 steroid drop, 1 topical antibiotic.

AGV = Ahmed Glaucoma Valve; BGI = Baerveldt Glaucoma Implant; AC = Anterior chamber
