# Supplementary material
Source: PubMed Central journal article supplement (PMC3020244)
Supplement: NIHMS233027-supplement-04.pdf [file NIHMS233027-supplement-04.pdf]

**Table 9: Operative techniques specific to Baerveldt Glaucoma Implant. N=130<sup>a</sup>**

|                                                           |           |
|-----------------------------------------------------------|-----------|
| Episcleral plate position                                 |           |
| Above rectus muscles                                      | 6 (5%)    |
| Below rectus muscles                                      | 124 (95%) |
| Method of tube occlusion:                                 |           |
| External ligature                                         | 98 (75%)  |
| External and anterior chamber ligature                    | 1 (1%)    |
| Internal stent                                            | 12 (9%)   |
| External ligature and internal stent                      | 18 (14%)  |
| Internal stent and external and anterior chamber ligature | 1 (1%)    |
| Tubes fenestrated                                         | 95 (73%)  |

<sup>a</sup>Three patients randomized to Baerveldt received Ahmed implants (protocol violations).
