# Supplementary material
Source: PubMed Central journal article supplement (PMC3020244)
Supplement: NIHMS233027-supplement-05.pdf [file NIHMS233027-supplement-05.pdf]

**Table 11. Intraoperative complications by previous experience of the surgeon with the particular type of shunt implanted**

| n (%)                         | 20+ cases<br>(n=215) | <20 cases<br>(n=61) | Fisher Exact P-<br>value |
|-------------------------------|----------------------|---------------------|--------------------------|
| HypHEMA                       | 18 (8%)              | 4 (7%)              | 0.79                     |
| Supra-choroidal<br>hemorrhage | 0                    | 0                   |                          |
| Scleral<br>perforation        | 1 (0.5%)             | 0                   | 1.00                     |
| Other<br>complication         | 3 (1%)               | 2 (3%)              | 0.31                     |
| Any<br>complication           | 22 (10%)             | 5 (8%)              | 0.81                     |
