# Supplementary material
Source: PubMed Central journal article supplement (PMC3020244)
Supplement: NIHMS233027-supplement-06.pdf [file NIHMS233027-supplement-06.pdf]

**APPENDIX**

The Ahmed versus Baerveldt Comparison Study

**Clinical Centers:**

*Duke University Eye Center, Leon Herndon, MD;*

*Glaucoma Associates of Texas, David Godfrey, MD, Ronald Fellman, MD;*

*Medical College of Wisconsin, The Eye Institute , James Robinson, MD, David Dueker, MD;*

*Minnesota Eye Consultants, Patrick Riedel, MD ,Thomas Samuelson, MD;*

*NIHR Biomedical Research Centre for Ophthalmology, Moorfields Eye Hospital,  
Keith Barton, MD;*

*National University Hospital, Dept of Ophthalmology, Paul Chew, MD;*

*Southern California Glaucoma Consultants, Alfred M Solish, MD;*

*Toronto Western Hospital Eye Clinic, Yvonne Buys, MD, Graham Trope, MD;*

*University of California Davis Medical Center, Department of Ophthalmology, James  
Brandt, MD, Michele Lim, MD;*

*University of California Los Angeles, Jules Stein Eye Institute, Simon Law, MD;*

*University of Campinas, Ophthalmology, Vital Costa, MD;*

*University of Miami, Bascom Palmer Eye Institute, Donald Budenz, Steven Gedde, MD;*

*University of Oklahoma, Dean A. McGee Eye Institute, Steve Sarkisian, MD*

*University of Southern California, Doheny Eye Institute, Vikas Chopra, MD, Brian Francis, MD, Mario Meallet, MD\*, Rohit Varma, MD*

*University of Tennessee at Memphis, Department of Ophthalmology, Peter Netland, MD\*\*, PhD, Sarwat Salim, MD*

*University of Texas Houston, Cizik Eye Clinic , Robert Feldman, MD, Nicholas Bell, MD*

\* No longer with the study; \*\*Currently affiliated with the University of Virginia

**Safety and Data Monitoring Committee,** Voting Members: Philip Chen, MD, *University of Washington, Department of Ophthalmology*; Dale Heuer, MD, *Medical College of Wisconsin, The Eye Institute*; Kuldev Singh, MD, MPH, *Stanford University*; Martha Wright, MD, *University of Minnesota, Department of Ophthalmology*. Non-voting members: Donald L Budenz, MD, William J. Feuer, MS, Joyce C. Schiffman, MS, *University of Miami, Bascom Palmer Eye Institute*.

**Steering Committee:** Keith Barton, MD, Donald L Budenz, MD, MPH, William J. Feuer, MS.

**Statistical Coordinating Center:** William J. Feuer, MS, Joyce C. Schiffman, MS, Wei Shi, MS; Coordinator, Luz Londono; Database Manager, Yolanda Silva, BS, *University of Miami, Bascom Palmer Eye Institute*.
